# Supplementary material
Source: PubMed Central journal article supplement (PMC4942273)

**Appendix 2.** Immunofluorescence pattern of tight junction protein ZO-1 in ARPE19 cultured on Transwell filters for 4 weeks

## Appendix 2

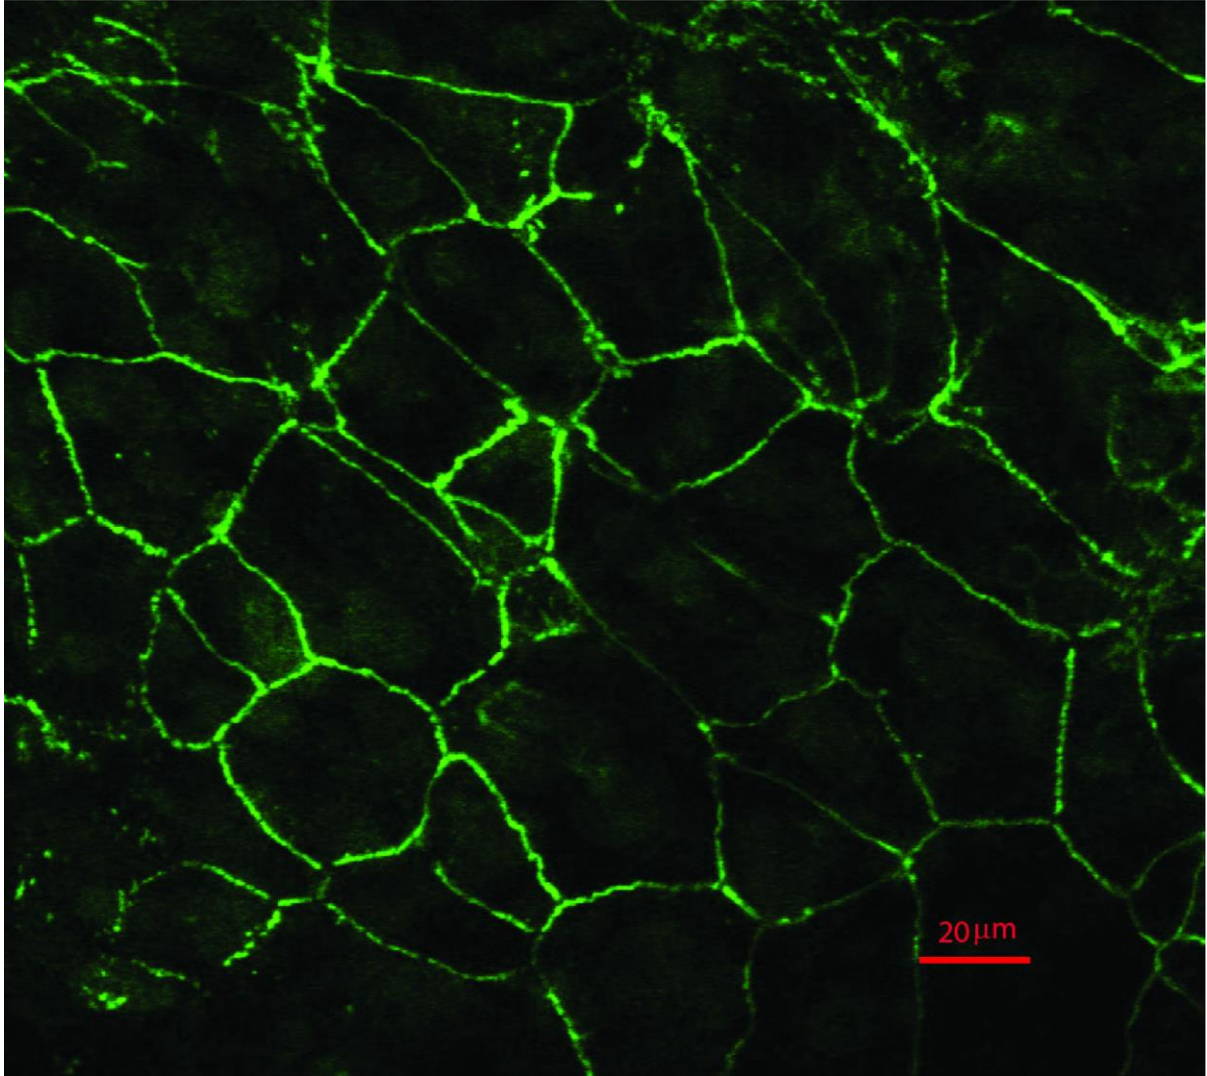

Supplement: NIHMS5416-supplement-Appendix_2.pdf [file NIHMS5416-supplement-Appendix_2.pdf]
